# Supplementary material
Source: PubMed Central journal article supplement (PMC5003425)

# Supplemental Figure 5

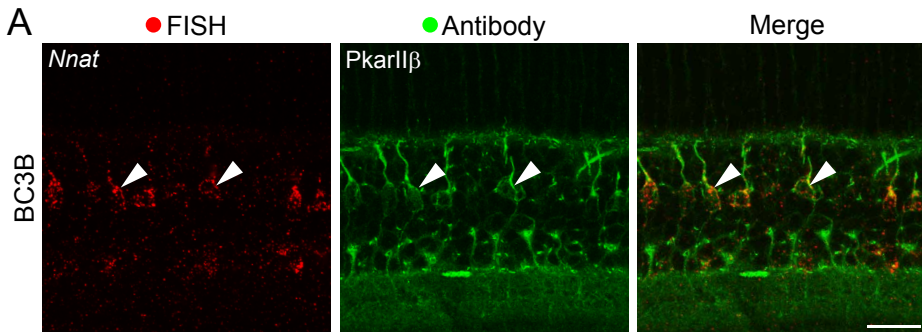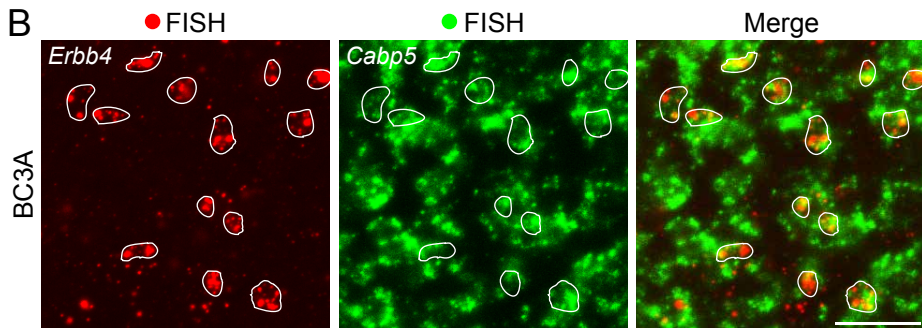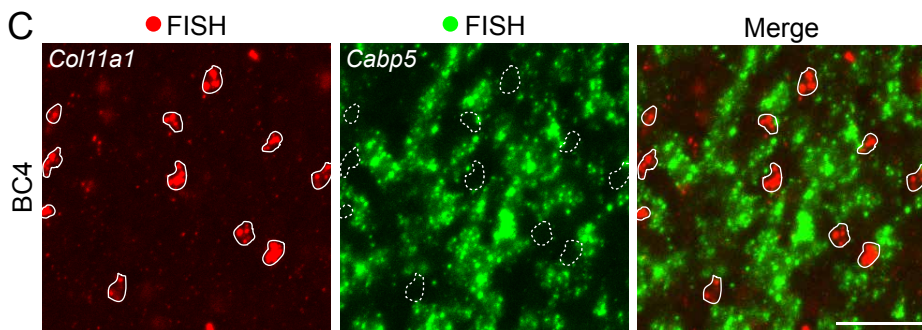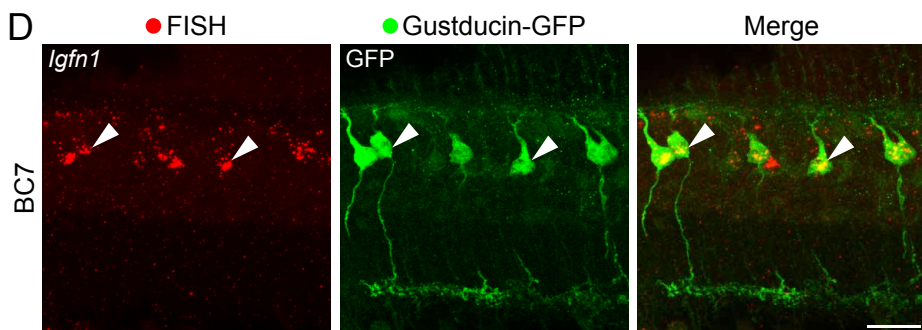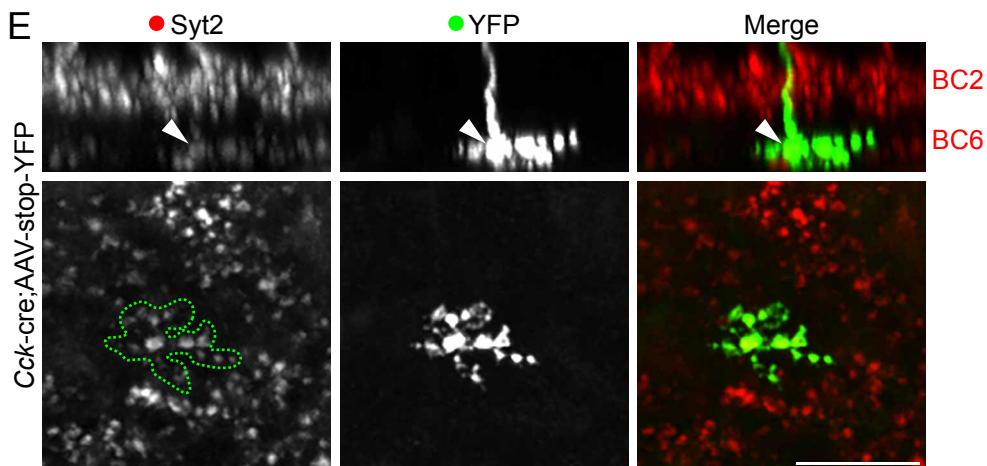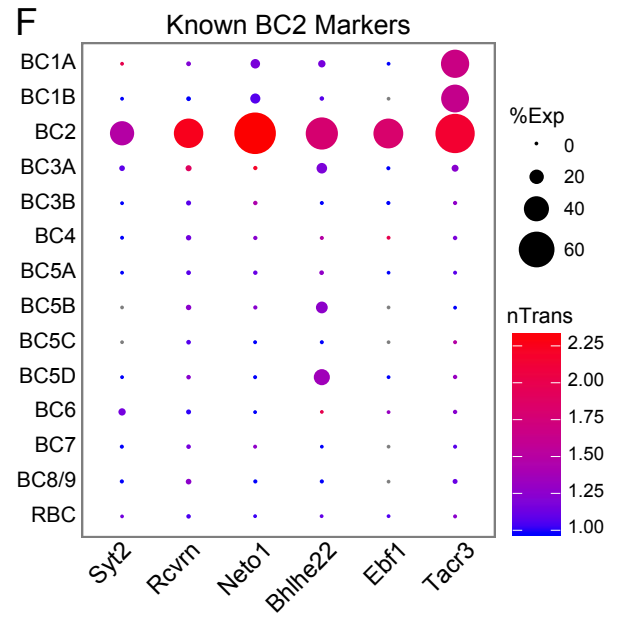

Supplement: NIHMS807574-supplement-5.pdf [file NIHMS807574-supplement-5.pdf]

# Supplemental Figure 6

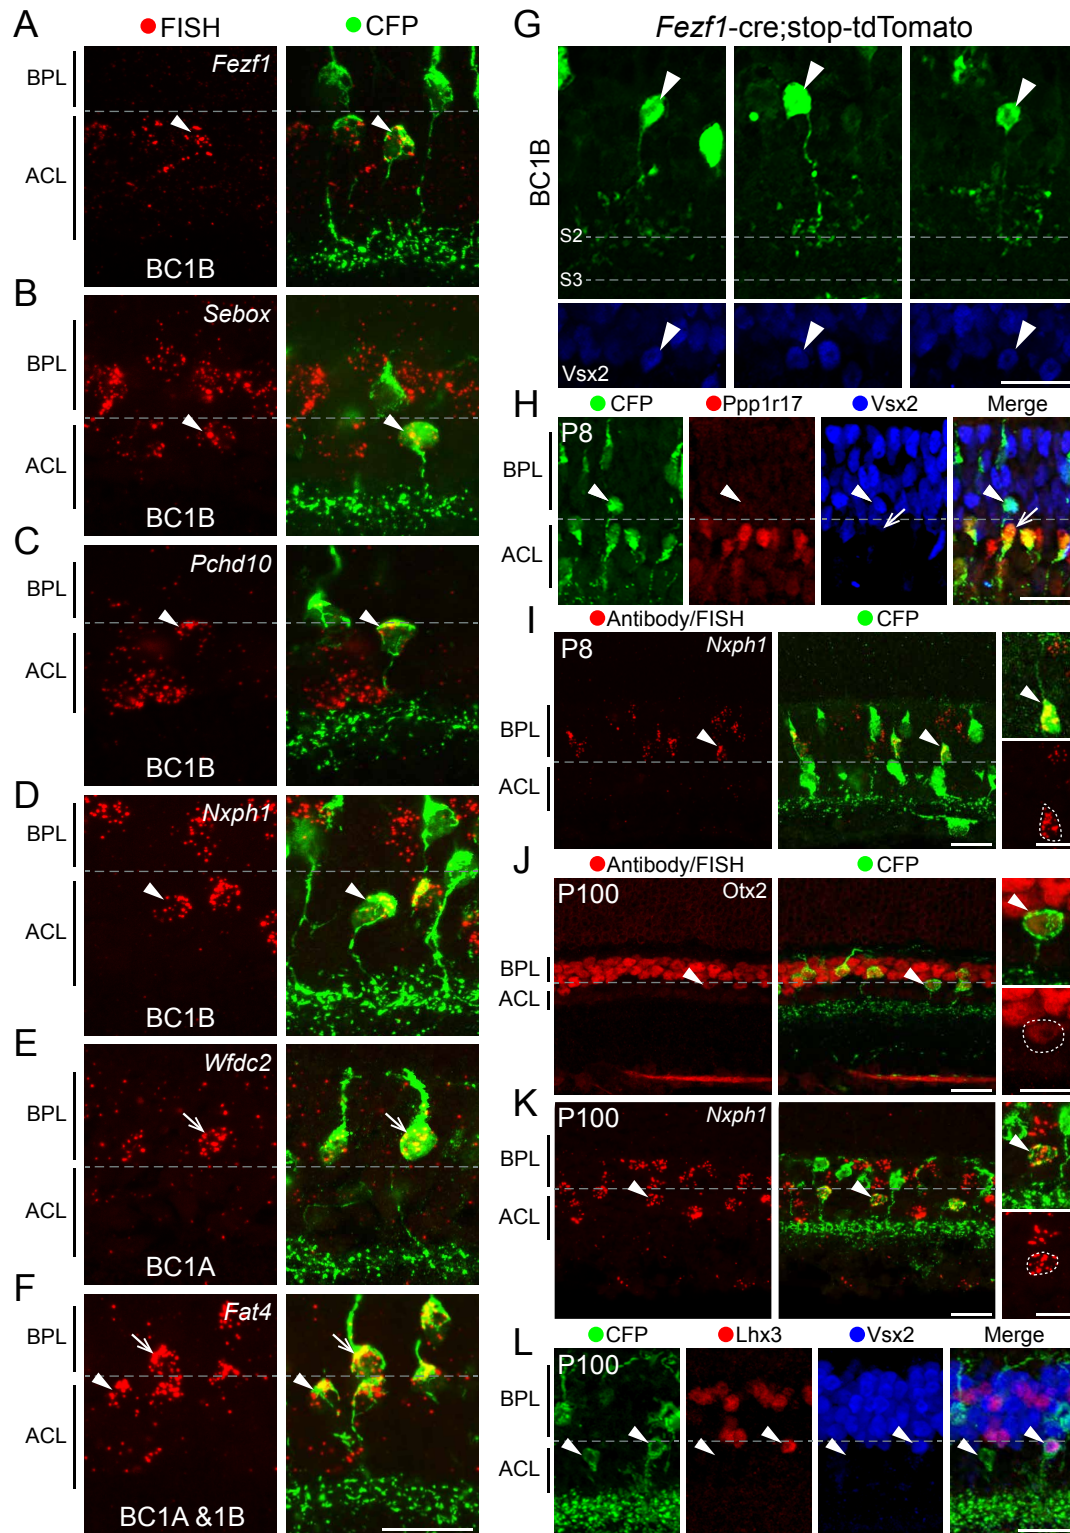

Supplement: NIHMS807574-supplement-6.pdf [file NIHMS807574-supplement-6.pdf]
